# Supplementary material
Source: PubMed Central journal article supplement (PMC3412482)

# Supplementary Figure S2

**a**

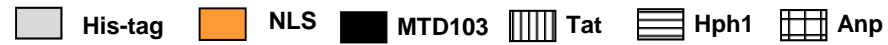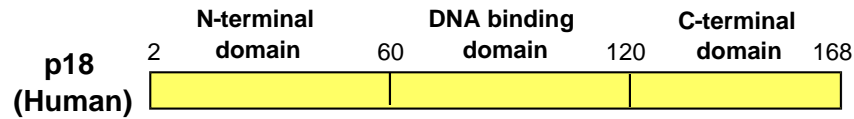

| Structure | Abbreviation          | Yield (mg/L) | Solubility |
|-----------|-----------------------|--------------|------------|
|           | Hp18                  | 41           | ***        |
|           | HM <sub>103</sub> p18 | 30           | ***        |
|           | HTatp18               | 2            | *          |
|           | HHphp18               | 5            | *          |
|           | HAntp18               | 4            | *          |

**b**

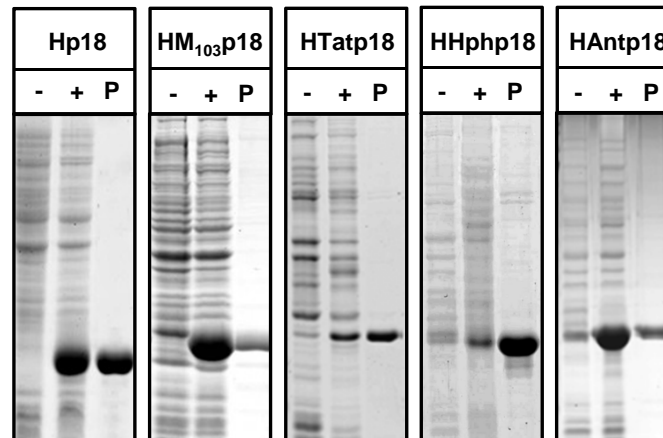

Supplement: mt2012102x2.pdf [file mt2012102x2.pdf]
