# Supplementary material
Source: PubMed Central journal article supplement (PMC3412482)
Supplement: mt2012102x10.pdf [file mt2012102x10.pdf]

## Supplementary Table S1

| MTD ID | Origin                            | Protein                           | HRSS                          | Final Modified Sequence |
|--------|-----------------------------------|-----------------------------------|-------------------------------|-------------------------|
| 39     | <i>Streptomyces coelicolor A3</i> | NP_625685                         | 12 IVALLLVPLVSLTAIWAFATVLT 34 | PLVLAIAAVL              |
| 41     | <i>Streptomyces coelicolor A3</i> | NP_626993                         | 12 LALGTAVLSAAALLAVAMPQEAQ 34 | AAALLAVA                |
| 52     | <i>Homo sapiens</i>               | ficolin 3 isoform 2 precursor     | 1 MDLLWILPSLWLLLLGGPACLK 22   | PLLLLLPAL               |
| 58     | <i>Alzheimer disease amyloid</i>  | Amyloid beta A4 protein precursor | 1 MLPGLALLLLAAWTARALEVPTD 23  | LALLLLAA                |
| 68     | <i>Streptomyces coelicolor A3</i> | NP_625639                         | 7 GAGALLASLLLAALPFTAEAAES 29  | LLLAALP                 |
| 101    | <i>Theileria annulata</i>         | Hypothetical protein              | 1 MKLMQLLLLLLCIIKTSNGVN 21    | LLLLLPII                |
| 103    | <i>Homo sapiens</i>               | TMBV19 domain family member B     | 7 GLLRLGSLLSLCLALSVLLLAQ 29   | LALPVLLLA               |
