# Supplementary material
Source: PubMed Central journal article supplement (PMC3412482)
Supplement: mt2012102x11.pdf [file mt2012102x11.pdf]

**Supplementary Table S2**

| Cargo | PTD          | Recombinant Protein | 5' Primers                                                                                                                                            | 3' Primers                                            |
|-------|--------------|---------------------|-------------------------------------------------------------------------------------------------------------------------------------------------------|-------------------------------------------------------|
| p18   | HIV-Tat      | HTatp18             | <b>HTatp18:</b><br>GGA TCC AAG AAG AAG AGG A<br>AG TAT GGC CGC AAA AAA CG<br>C CGC CAG CGC CGC CGC AT<br>G GCC GAG CCT TGG GGG                        | <b>Hp18:</b><br>AAG CTT TTA TTG AAG ATT TGT<br>GGC TC |
|       | Hph1         | HHphp18             | <b>HHph18:</b><br>GGA TCC AAG AAG AAG AGG<br>AAG TAT GCT CGC GTT CGC<br>AGG CGT GGA CCC CGC CGC<br>ATG GCC GAG CCT TGG GGG                            |                                                       |
|       | Antennapedia | HAntp18             | <b>HAntpp18:</b><br>GGA TCC AAG AAG AAG AGG A<br>AG CGT CAG ATC AAA ATC TGG<br>TTC CAG AAT CGT CGT ATG AA<br>G TGG AAA AAA ATG GCC GAG<br>CCT TGG GGG |                                                       |
