# Supplementary material
Source: PubMed Central journal article supplement (PMC3412482)
Supplement: mt2012102x12.pdf [file mt2012102x12.pdf]

**Supplementary Table S3**

| Cargo | MTD                | Recombinant Protein                   | 5' Primers                                                                                                                                     | 3' Primers                                                                                                                    |
|-------|--------------------|---------------------------------------|------------------------------------------------------------------------------------------------------------------------------------------------|-------------------------------------------------------------------------------------------------------------------------------|
| p18   | Non                | Hp18                                  | <b>Hp18:</b><br>CCG CAT ATG AAG AAG AAG<br>AGG AAG GCC GAG CCT TGG<br>GGG AAC GAG                                                              | <b>Hp18:</b><br>CCG CAT ATG TCA TTG AAG<br>ATT TGT GGC TCC                                                                    |
|       | MTD <sub>101</sub> | HM <sub>101</sub> p18                 | <b>HM<sub>101</sub>p18:</b><br>CCG CAT ATG AAG AAG AAG<br>AGG AAG CTG ATT CTG CTG<br>CTG CTG CCG ATT ATT GCC<br>GAG CCT TGG GGG AAC GAG<br>TTG |                                                                                                                               |
|       |                    | Hp18M <sub>101</sub>                  | <b>Hp18:</b><br>CCG CAT ATG AAG AAG AAG<br>AGG AAG GCC GAG CCT TGG<br>GGG AAC GAG                                                              | <b>Hp18M<sub>101</sub>:</b><br>CCG CAT ATG TCA AAT AAT<br>CGG CAG CAG CAG CAG AA<br>T CAG TTG AAG ATT TGT G<br>GC TCC CCC AGC |
|       |                    | HM <sub>101</sub> p18M <sub>101</sub> | <b>HM<sub>101</sub>p18:</b><br>CCG CAT ATG AAG AAG AAG<br>AGG AAG CTG ATT CTG CTG<br>CTG CTG CCG ATT ATT GCC<br>GAG CCT TGG GGG AAC GAG<br>TTG |                                                                                                                               |
|       | MTD <sub>103</sub> | HM <sub>103</sub> p18                 | <b>HM<sub>103</sub>p18:</b><br>CCG CAT ATG AAG AAG AAG<br>AGG AAG CTG GCG CTG CCG<br>GTG CTG CTG CTG GCG GCC<br>GAG CCT TGG GGG AAC GAG<br>TTG | <b>Hp18:</b><br>CCG CAT ATG TCA TTG AAG<br>ATT TGT GGC TCC                                                                    |
|       |                    | Hp18M <sub>103</sub>                  | <b>Hp18:</b><br>CCG CAT ATG AAG AAG AAG<br>AGG AAG GCC GAG CCT TGG<br>GGG AAC GAG                                                              | <b>Hp18M<sub>103</sub>:</b><br>CCG CAT ATG TCA CGC CA<br>G CAG CAG CAC CGG CAG<br>CGC CAG TTG AAG ATT TGT<br>GGC TCC CCC AGC  |
|       |                    | HM <sub>103</sub> p18M <sub>103</sub> | <b>HM<sub>103</sub>p18:</b><br>CCG CAT ATG AAG AAG AAG<br>AGG AAG CTG GCG CTG CCG<br>GTG CTG CTG CTG GCG GCC<br>GAG CCT TGG GGG AAC GAG<br>TTG |                                                                                                                               |
