# Supplementary material
Source: PubMed Central journal article supplement (PMC3412482)

Supplementary  
Figure S1

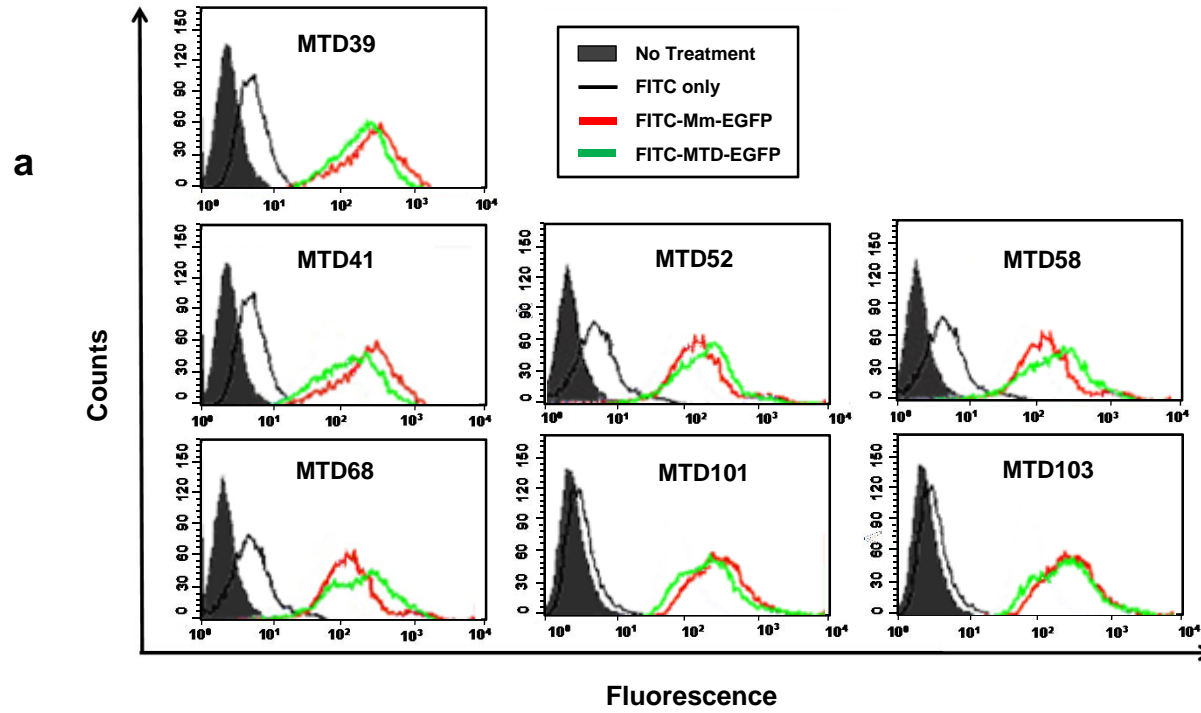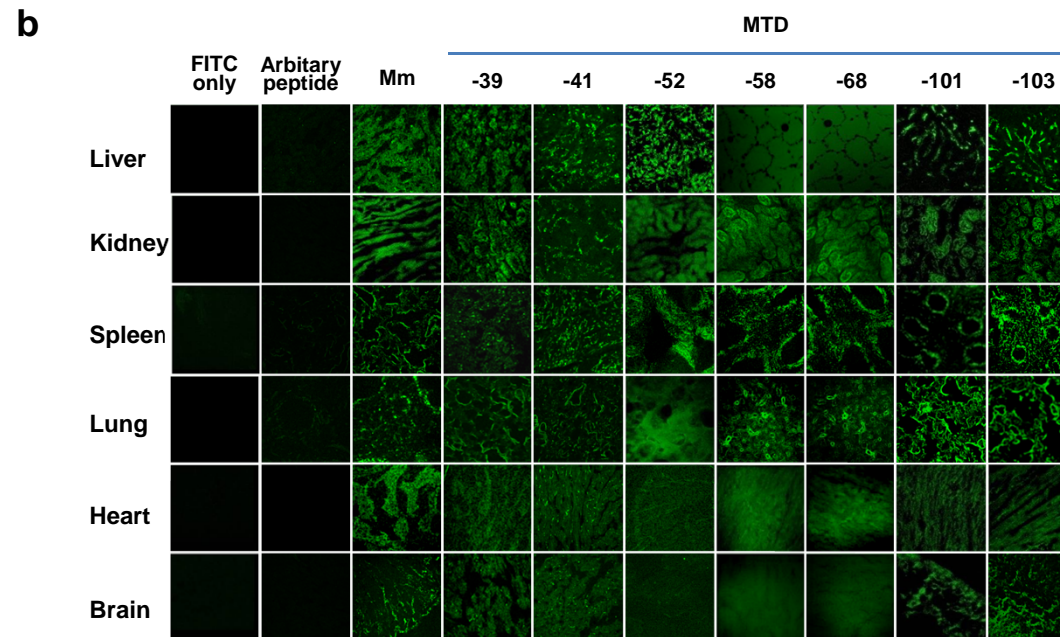

Supplement: mt2012102x1.pdf [file mt2012102x1.pdf]

Supplementary  
Figure S3

a

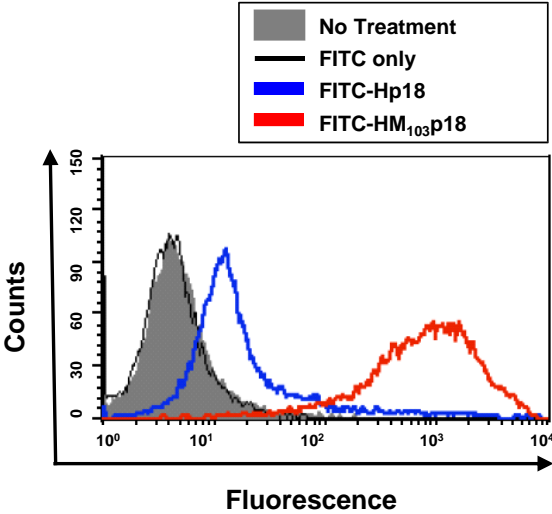

b

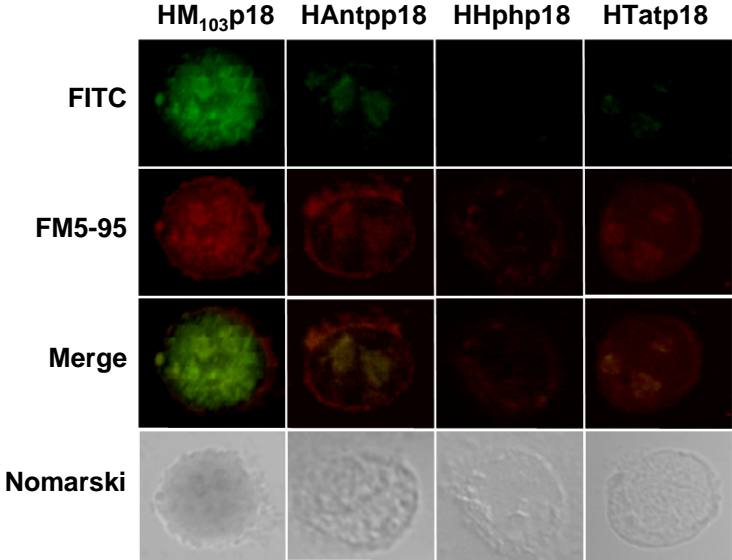

Supplement: mt2012102x3.pdf [file mt2012102x3.pdf]

Supplementary  
Figure S4

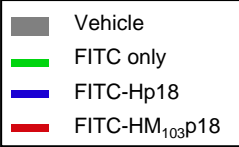

**a**

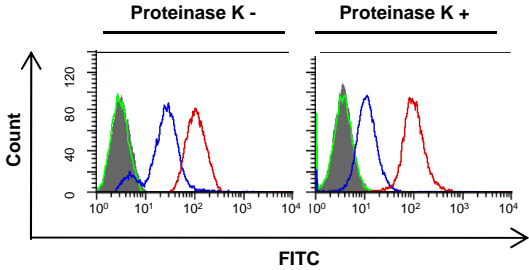

**b**

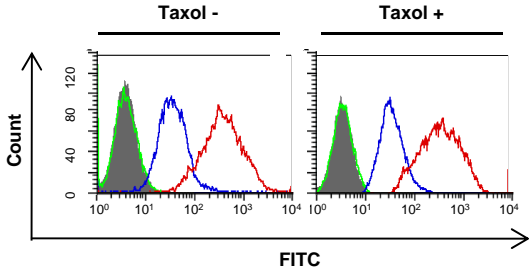

**c**

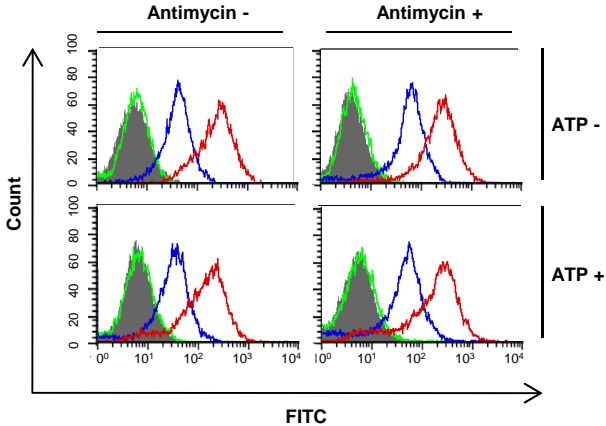

Supplement: mt2012102x4.pdf [file mt2012102x4.pdf]

# Supplementary Figure S5

a

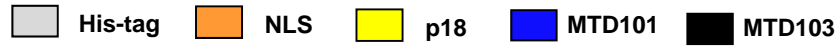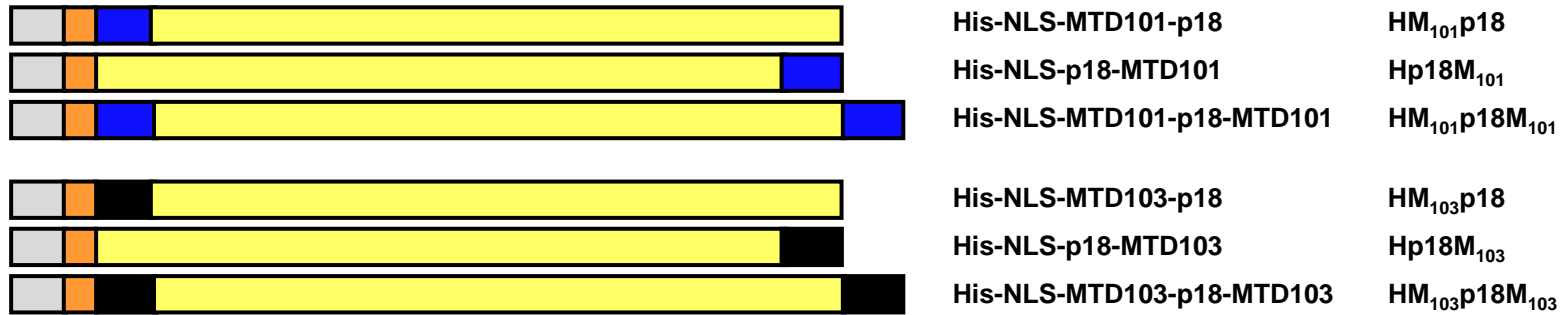

b

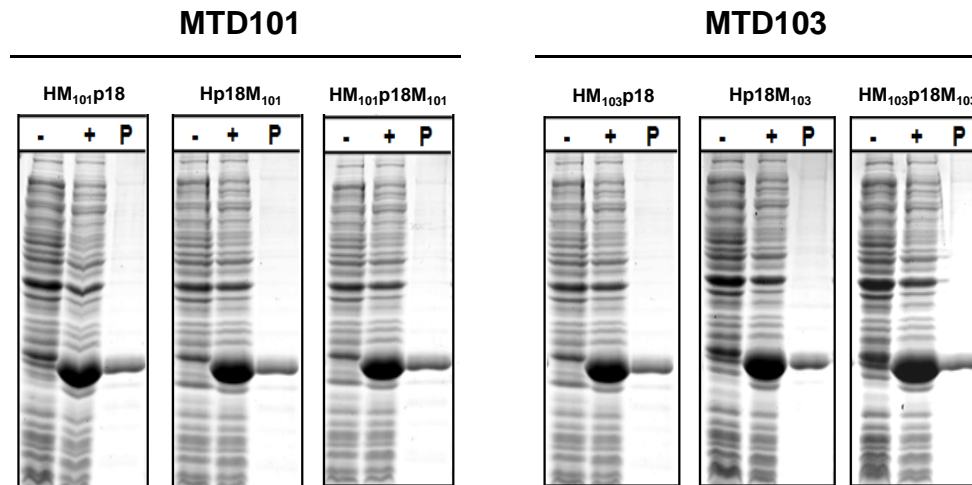

Supplement: mt2012102x5.pdf [file mt2012102x5.pdf]

Supplementary  
Figure S6

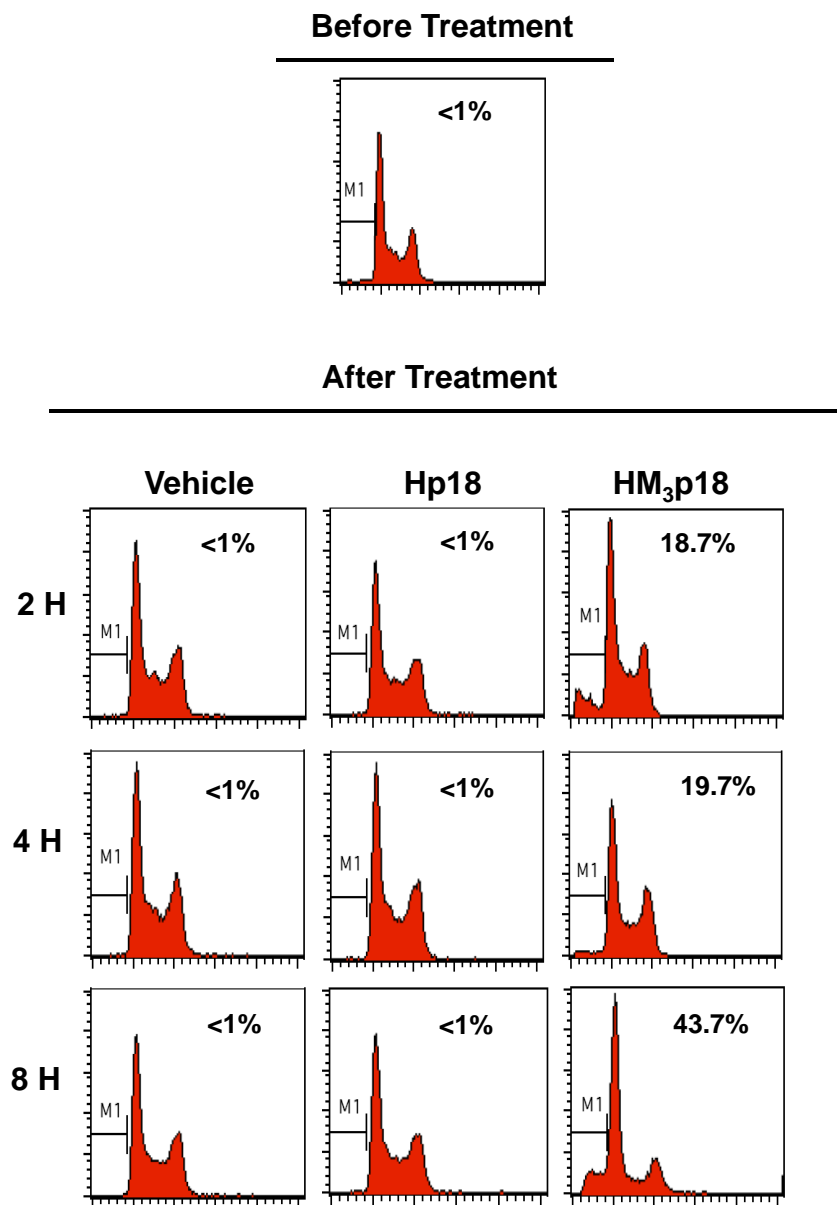

Supplement: mt2012102x6.pdf [file mt2012102x6.pdf]

# Supplementary Figure S7

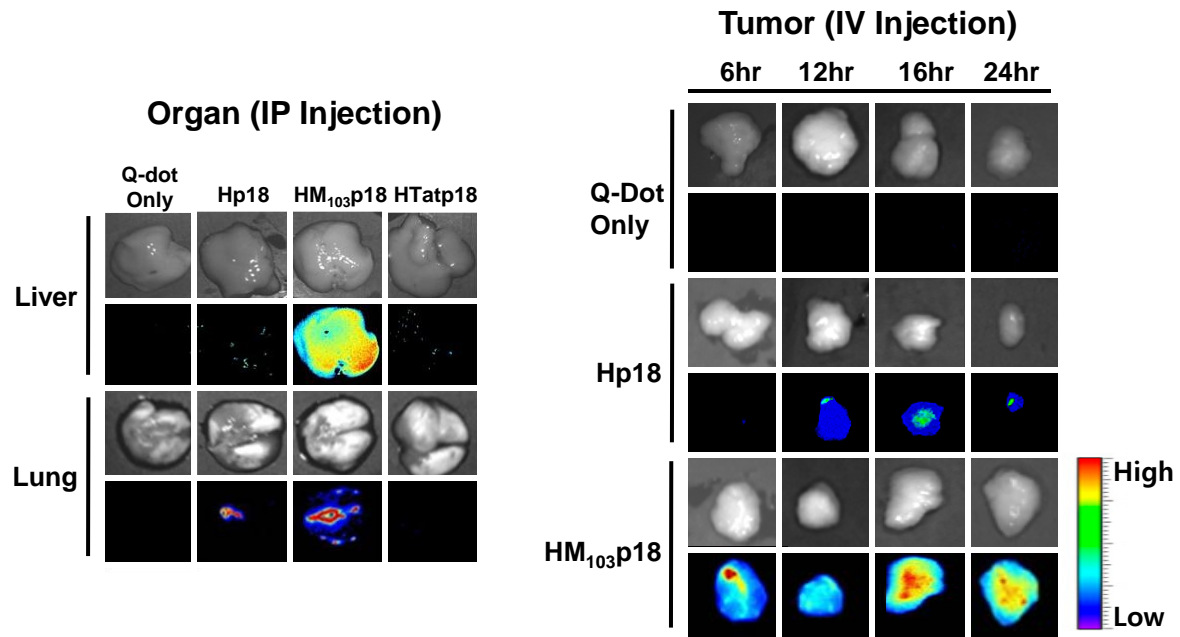

Supplement: mt2012102x7.pdf [file mt2012102x7.pdf]

# Supplementary Figure S8

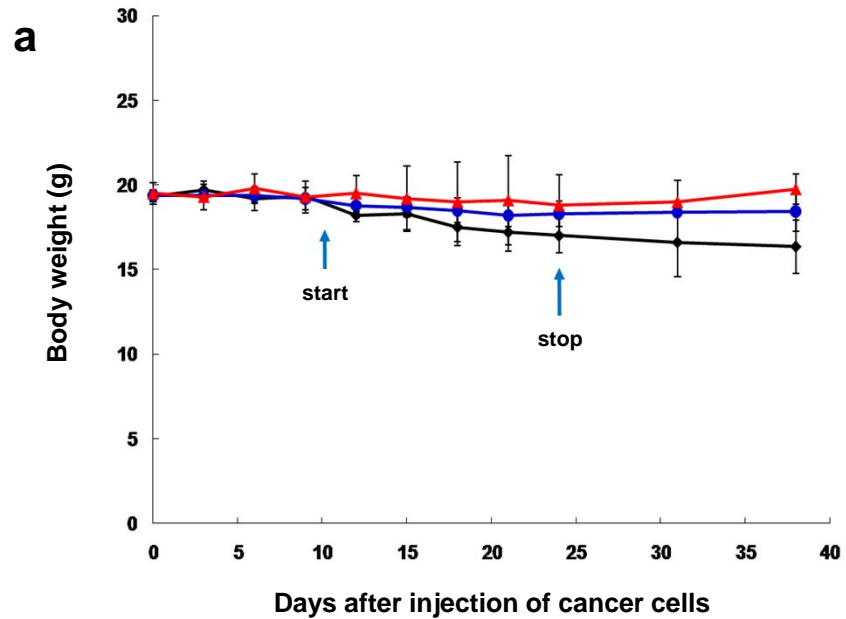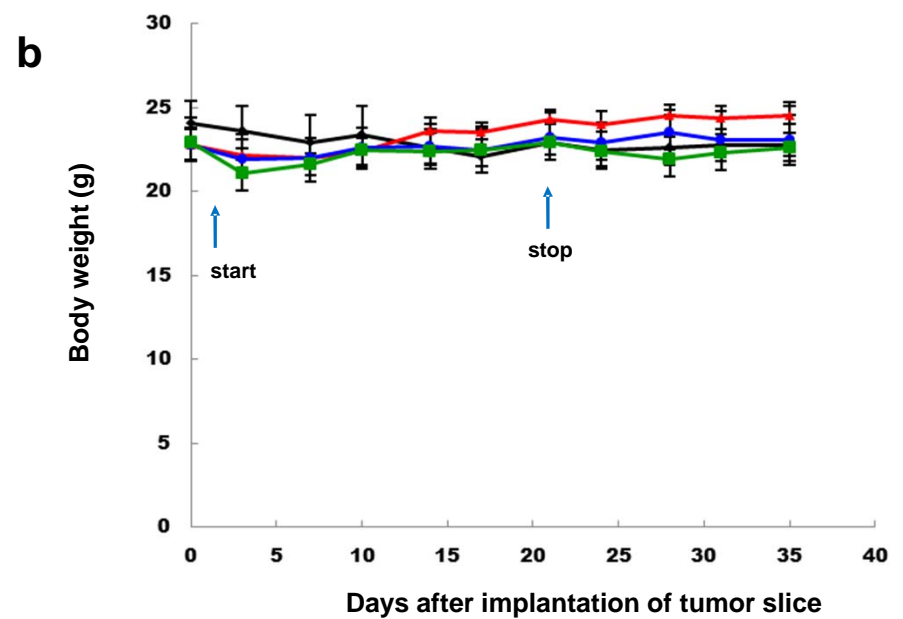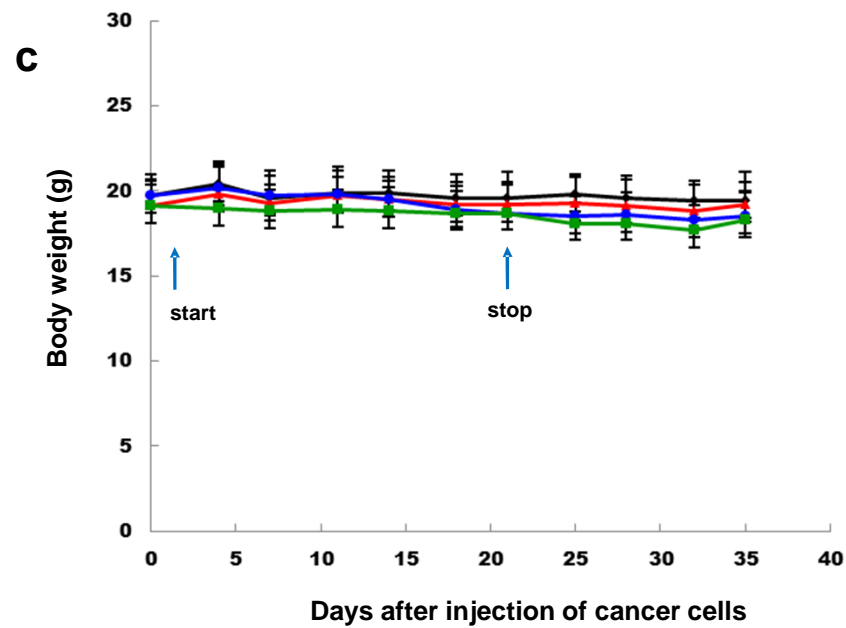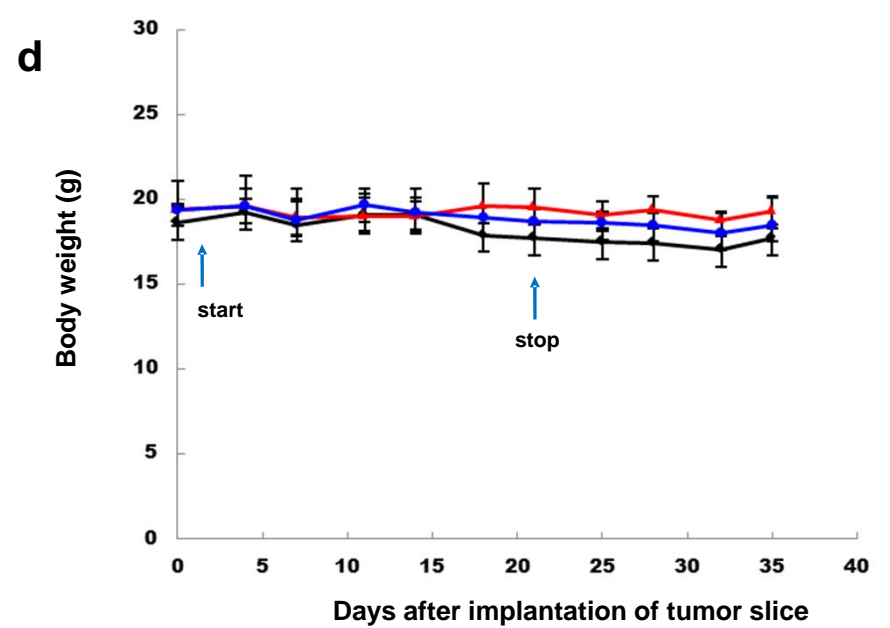

Supplement: mt2012102x8.pdf [file mt2012102x8.pdf]

**Supplementary  
Figure S9**

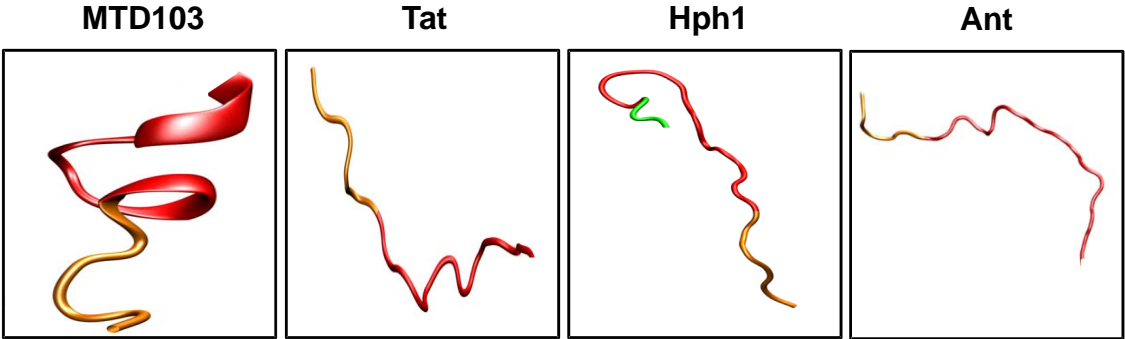

Supplement: mt2012102x9.pdf [file mt2012102x9.pdf]
